# Supplementary material for: Enhanced one-pot selective conversion of cellulose to ethylene glycol over NaZSM-5 supported metal catalysts
Source: Royal Society of Chemistry journal article supplement (doi:10.1039/d1nj03257g), 2021-01-01
Supplement: d1nj03257g2.pdf [file d1nj03257g2.pdf]

## Supplementary Information

---

### Enhanced one-pot selective conversion of cellulose to ethylene glycol over NaZSM-5 supported metal catalysts

Sreejith Sreekantan<sup>a</sup>, Arun Arunima Kirali<sup>a</sup>, Banu Marimuthu,<sup>\*ab</sup>

<sup>a</sup>Catalysis and Inorganic Chemistry Division,  
CSIR-National Chemical Laboratory, Dr.Homi Bhabha Road, Pune-411008, India

<sup>b</sup>Academy of Scientific and Innovative Research, Ghaziabad, Uttar Pradesh- 201 002, India

**KEYWORDS** : *Biomass conversion, Cellulose hydrogenolysis, Ethylene glycol, Retro-aldol condensation, Renewable resources, Sustainability.*

---

- Table S1**      **The acidity of the prepared catalysts as obtained from TPD-NH<sub>3</sub> analysis.**
- Table S2**      **(a) The reusability data at low conversion (2hours)**  
**(b) The reusability data at 6 hours**  
**(c) The reusability data at long run (12 hours)**
- Table S3**      **The reaction data of different catalysts supported on NaZSM-5 support**
- Table S4**      **The list of references which calculated EG yield in terms of carbon mol %**
- Table S5**      **Comparison of the reusability of different Ni-W catalysts in the conversion of cellulose to EG**
- Figure S1**     **(a) TG curve for Fresh and spent catalyst**  
**(b) TG/DTA curve for spent catalyst**
- Figure S2**     **(a)HPLC chromatogram of the liquid products at 12h reactions**  
**(b) HPLC chromatogram of the liquid products at 6h reactions**  
**(c) The calibration curve for the product (Ethylene Glycol)**

## 1. NH<sub>3</sub>- TPD

Acidity of the catalyst was examined by NH<sub>3</sub>-temperature programmed desorption using Micromeritics Autochem-2920 instrument (USA). Around 50 mg of the sample was taken and pre-treated under helium atmosphere at 300°C with constant flow rate (20 mL.min<sup>-1</sup>) for 30 min which was controlled by mass flow controller (Brooks). Then, temperature was brought down to 50 °C and NH<sub>3</sub> was adsorbed to sample surface using 10 % NH<sub>3</sub> in He (20 mL.min<sup>-1</sup>) Pure He (20 mL.min<sup>-1</sup>) was flushed for 30 min at 100 °C to remove any physisorbed NH<sub>3</sub> from the sample surface. The desorption of NH<sub>3</sub> was performed in He flow (20 mL.min<sup>-1</sup>) by raising the temperature 100-900°C at 5 °Cmin<sup>-1</sup> and the desorbed NH<sub>3</sub> was monitored by thermal conductivity detector (TCD).

| Entry No # | Catalyst               | Acid Amounts (mmol NH <sub>3</sub> g <sup>-1</sup> ) |                    |               |
|------------|------------------------|------------------------------------------------------|--------------------|---------------|
|            |                        | Weak <200°C                                          | Medium 250°C-350°C | Strong >350°C |
| 1          | 5%Al-8%Ni-25%W/NaZSM-5 | 0.64                                                 | 0                  | 0.12          |
| 2          | 3%Al-8%Ni-25%W/NaZSM-5 | 0                                                    | 1.25               | 0.02          |
| 3          | 5%Al-6%Ni-10%W/NaZSM-5 | 1.13                                                 | 0                  | 0.15          |
| 4          | 8%Ni-15%W/NaZSM-5      | 0.23                                                 | 0                  | 0.11          |

**Table S1. The acidity of the prepared catalysts as obtained from TPD-NH<sub>3</sub> analysis.**

## 2. The reusability tests

The reusability studies of catalyst has been carried out at three different reaction conditions (at low conversion, at 6h and in long run (at 12h) to study the product distribution in the reaction. The catalyst obtained in after every run is been thoroughly washed with distilled water, dried at 110°C overnight and calcined at 550°C at 5°Cmin<sup>-1</sup> ramping rate for 4 h, in muffle furnace. The calcined sample was reduced at 400°C for 4 h under H<sub>2</sub> atmosphere before carrying out the next run

| Run No. | Conversion (%) | Yield (%) |        |         |          |        | Total Glycols |
|---------|----------------|-----------|--------|---------|----------|--------|---------------|
|         |                | EG        | 1,2-PG | Glucose | Sorbitol | Others |               |
| Run 0   | 45.56          | 52.9      | 7.8    | 26.0    | 7.4      | 5.9    | 60.7          |
| Run 1   | 54.19          | 51.1      | 6.1    | 29.6    | 3.0      | 10.2   | 57.2          |
| Run 2   | 66.87          | 32.1      | 20.3   | 29.4    | 1.8      | 16.4   | 52.4          |
| Run 3   | 83.20          | 16.5      | 32.6   | 21.4    | 0.5      | 29.0   | 49.1          |

**Table S2 a. The reusability studies of 5%Al-8%Ni-25%W/NaZSM-5 (Low Conversion)**

(Reaction conditions : . Reaction conditions: cellulose: 0.20 g; catalyst: 0.20 g; water: 20 ml; pressure: 45 bar H<sub>2</sub> (at room temperature); temperature: 200 °C; time: 2 h; stirring speed: 1000 rpm.)

| Run No. | Conversion (%) | Yield (%) |        |         |          |        | Total Glycols |
|---------|----------------|-----------|--------|---------|----------|--------|---------------|
|         |                | EG        | 1,2-PG | Glucose | Sorbitol | Others |               |
| Run 0   | 100            | 74.2      | 8.4    | 12.8    | 2.9      | 1.7    | 82.6          |
| Run 1   | 100            | 73.4      | 10.6   | 8.3     | 3.3      | 4.4    | 84.0          |
| Run 2   | 100            | 70.5      | 10.2   | 12.3    | 5.0      | 2      | 80.7          |
| Run 3   | 100            | 64.7      | 14.3   | 11.7    | 2.0      | 7.3    | 79.0          |

**Table S2 b. The reusability studies of 5%Al-8%Ni-25%W/NaZSM-5**

(Reaction conditions : . Reaction conditions: cellulose: 0.20 g; catalyst: 0.20 g; water: 20 ml; pressure: 40 bar H<sub>2</sub> (at room temperature); temperature: 220 °C; time: 6 h; stirring speed: 1000 rpm.)

| Run No. | Conversion (%) | Yield (%) |        |         |          |        | Total Glycols |
|---------|----------------|-----------|--------|---------|----------|--------|---------------|
|         |                | EG        | 1,2-PG | Glucose | Sorbitol | Others |               |
| Run 0   | 100%           | 89.0      | 0.8    | 6.5     | 0.4      | 3.3    | 89.8          |
| Run 1   | 100%           | 83.6      | 2.0    | 5.5     | 1.2      | 7.7    | 85.6          |
| Run 2   | 100%           | 76.1      | 2.6    | 11.6    | 1.7      | 8      | 78.7          |
| Run 3   | 100%           | 57.8      | 13.8   | 20.7    | 3.1      | 4.6    | 71.6          |

**Table S2 c. The reusability studies of 5%Al-8%Ni-25%W/NaZSM-5 (Long Run)**

(Reaction conditions : cellulose: 0.20 g; catalyst: 0.20 g; water: 20 ml; pressure: 40 bar H<sub>2</sub> (at room temperature); temperature: 220 °C; time: 12 h; stirring speed: 1000 rpm.)

### 3. TG/DTA for fresh and spent catalyst

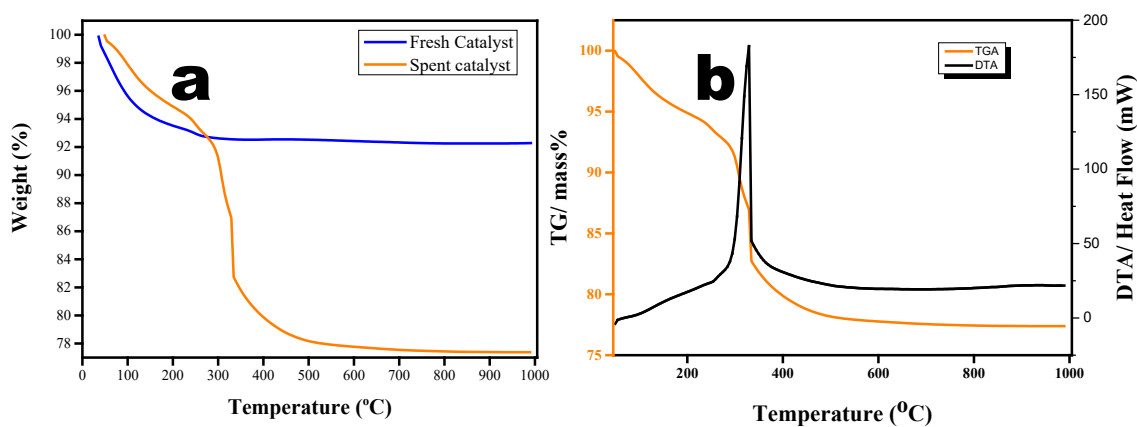

**Fig. S1 :** (a) TG curve for Fresh and spent catalyst (at 220°C, 70 bar H<sub>2</sub>, 1000rpm, 6h reaction condition) (b) TG/DTA curve for spent catalyst

#### 4. One-pot catalytic conversion of cellulose to ethylene glycol – Reaction data

| Entry # | Metal Loading (%) |    |    | Support     | Conversion (%) | Yield (%) |       |       |       |      |                      |
|---------|-------------------|----|----|-------------|----------------|-----------|-------|-------|-------|------|----------------------|
|         | Al                | Ni | W  |             |                | EG        | PG    | Sor   | Glu   | Gly  | Total Glycol [EG+PG] |
| 1       | 0                 | 8  | 15 |             | 100            | 48.8      | 4.23  | 26.97 | 15.37 | 2.53 | 53.03                |
| 2       | 0                 | 8  | 20 |             | 100            | 51.6      | 3.88  | 21.88 | 19.14 | 2.43 | 55.48                |
| 3       | 7                 | 8  | 20 |             | 100            | 60.9      | 5.11  | 17.35 | 12.04 | 3.03 | 66.01                |
| 4       | 5                 | 6  | 10 | NaZSM-5     | 100            | 61.75     | 4.15  | 17.08 | 13.07 | -    | 65.9                 |
| 5       | 5                 | 8  | 20 |             | 100            | 67.22     | 6.03  | 10.19 | 12.16 | -    | 73.25                |
| 6       | 5                 | 8  | 25 |             | 100            | 70.85     | 9.2   | 2.54  | 12.75 | 0.87 | 80.05                |
| 7       | 5                 | 8  | 30 |             | 100            | 70.45     | 10.07 | 2.33  | 12.97 | 1.05 | 80.52                |
| 8       | 5                 | 4  | 25 |             | 100            | 19.09     | 20.28 | -     | 24.63 | 5.51 | 39.37                |
| 9       | 5                 | 8  | 25 | HZSM-5      | 100            | 65.47     | 15.48 | 11.06 | 1.84  | 0.45 | 80.95                |
| 10      | 5                 | 8  | 25 | HZSM-5(1:1) | 100            | 53.21     | 5.06  | 4.62  | 11.82 | 1.11 | 58.27                |

**Tables 3: Hydrolytic hydrogenation reactions of cellulose to ethylene glycol carried out in 50 ml stainless steel Parr Batch reactor.**

Reaction Conditions : 0.20g cellulose, 0.15gm catalyst and 20 ml water at 40 bar H<sub>2</sub> pressure at 220°C for 6 hours at 1000rpm.  
 EG= Ethylene glycol, PG= 1,2-Propanediol, Sor= Sorbitol , Glu = Glucose, Gly= Glycerol  
 Note: HZSM-5 (1:1) corresponds that equal amount of cellulose and metal loaded catalyst on HZSM-5 is been used.

## 5. HPLC chromatogram

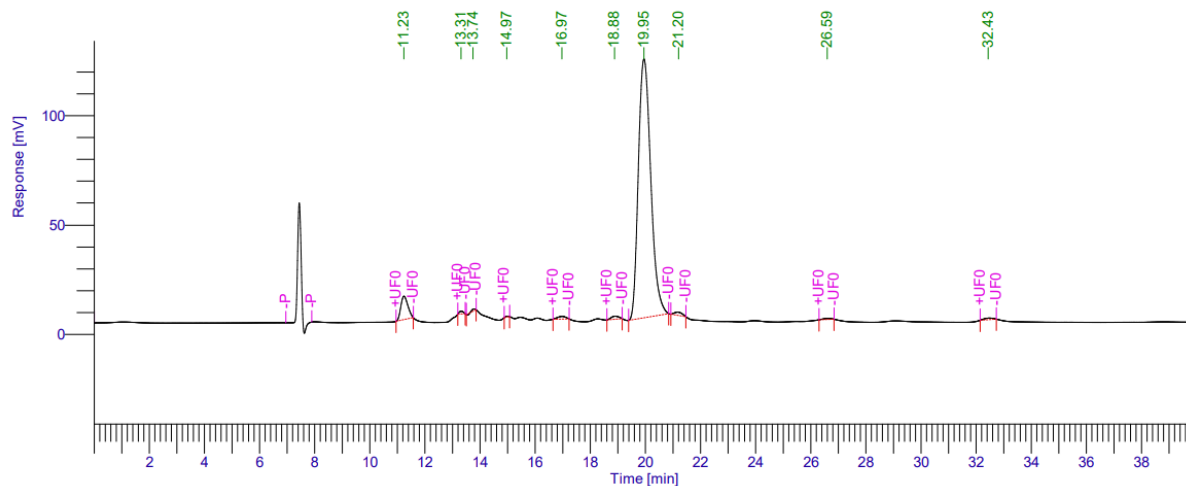

**Fig. S2a :** The HPLC chromatogram of 5%Al-8%Ni-25%W/NaZSM-5 catalyst on cellulose conversion for 12h,70 bar H<sub>2</sub> at 220°C, 1000rpm

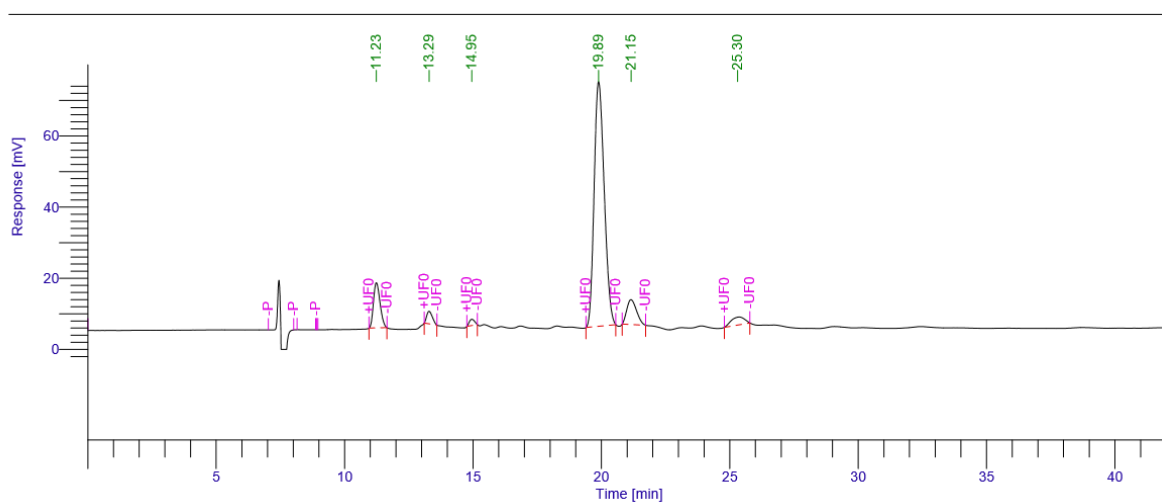

**Fig. S2b :** The HPLC chromatogram of 5%Al-8%Ni-25%W/NaZSM-5 catalyst on cellulose conversion for 6h,70 bar H<sub>2</sub> at 220°C, 1000rpm

The incorporated is the HPLC chromatogram of the one-pot catalytic conversion of cellulose to ethylene glycol over 5%Al-8%Ni-25%W/NaZSM-5 catalyst for the reaction conditions, cellulose: 0.20 g; catalyst: 0.20 g; water: 20 ml; pressure: 40 bar H<sub>2</sub> (at room temperature); temperature: 220 °C; time: 12 h and 6 h; stirring speed: 1000 rpm.

The peak at the retention times 19.95 correspond to the EG, 21.2 corresponds to 1,2-PDO, 11.23 corresponds to glucose, 26.59 to ethanol, 13.31 and 13.74 represents sorbitol and mannitol respectively, 14.97 is xylitol, 16.97 represents glycerol 32.43 is 2-propanol. The peak before retention time 8 is the solvent peak.

Calibration of HPLC is done by plotting the calibration curve Fig S2c. A set of 5 standard solutions of ethylene glycol has been made in 20 mL millipore water and the was injected to the HPLC separately. The analysis condition remains the same as for product analysis (Oven temperature : 60°C, Flow rate : 0.5 mL min<sup>-1</sup>). The areas under the peak after each individual injections are noted. The graph is plotted against Weight of standard VS Area obtained. The slope will give the R<sub>f</sub> factor. Thus the numbers of moles are obtained from the HPLC. And the values are substituted in the equation given in the manuscript to find out the yield. Since cellulose is the polymer of glucose, the M<sub>c</sub> is taken as 162.14, the relative mass of one glucose unit and k<sub>c</sub> is taken as 6. The k<sub>i</sub> accounts for the carbon number of the product and for EG it is 2.

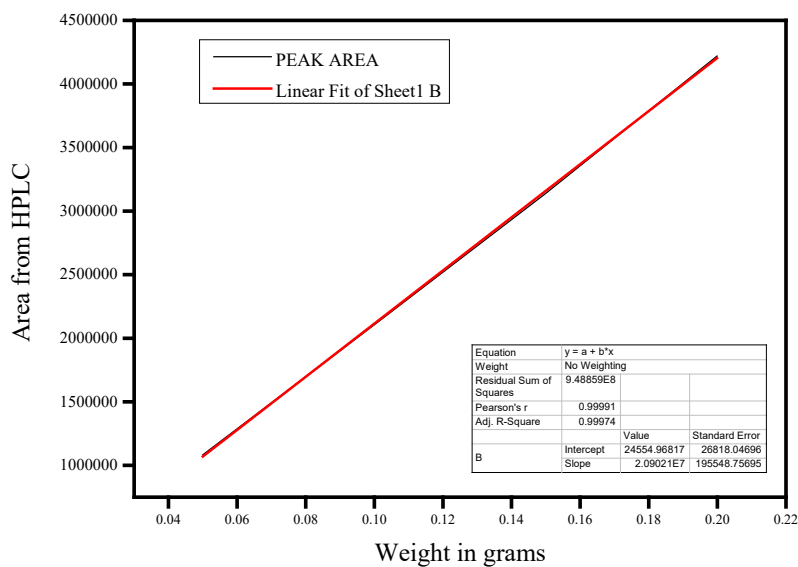

**Fig. S2c** :The calibration curve of the product, Ethylene glycol

**6. The list of references which calculated EG yield in terms of carbon mol%**

| Sl No | Catalyst                        | Reaction Condition                        | EG Yield%                                | Reference                                                                               | DOI                                                                                                         |
|-------|---------------------------------|-------------------------------------------|------------------------------------------|-----------------------------------------------------------------------------------------|-------------------------------------------------------------------------------------------------------------|
| 1     | Ni-W@C                          | 240°C, 5MPa, 1h                           | 99% cellulose conversion and 60.1% EG    | <i>Cellulose</i> <b>27</b> , 7591–7605 (2020)                                           | <a href="https://doi.org/10.1007/s10570-020-03340-1">https://doi.org/10.1007/s10570-020-03340-1</a>         |
| 2     | 1wt% Ru /h-WO <sub>3</sub>      | 240°C, 4MPa, 2h                           | 77.5%                                    | Bioresource Technology <b>264</b> : 58-65 (2018)                                        | <a href="https://doi.org/10.1016/j.biortech.2018.05.026">https://doi.org/10.1016/j.biortech.2018.05.026</a> |
| 3     | Ru/W/AC                         | Mix milling (4 minutes) 220°C, 6.5MPa, 3h | 90% conversion with EG yield % of 34.2 % | <i>Green Chem.</i> , 2015, <b>17</b> , 3075-3083                                        | <a href="https://doi.org/10.1039/C5GC00421G">https://doi.org/10.1039/C5GC00421G</a>                         |
| 4     | 1% Ru/WO <sub>3</sub> nanosheet | 4 MPa H <sub>2</sub> , 240 °C, 2 h        | 76.3%                                    | <i>Green Chem.</i> , 2017, <b>19</b> , 682-691                                          | <a href="https://doi.org/10.1039/C6GC01327A">https://doi.org/10.1039/C6GC01327A</a>                         |
| 5     | Ni–W/M                          | 240 °C, 4 MPa H <sub>2</sub> , 120 min    | 68.7%                                    | <i>ACS Sustainable Chemistry &amp; Engineering</i> <b>2020</b> <i>8</i> (26), 9650-9659 | <a href="https://doi.org/10.1021/acssuschemeng.0c00836">https://doi.org/10.1021/acssuschemeng.0c00836</a>   |

**Table S4.** List of literatures reported the ethylene glycol yields in terms of C-mol %



**7. The comparison of reusability of different Ni-W supported metal catalysts on EG yield on cellulose conversion.**

| Sl No | Catalyst                                              | Conversion (%) | Y <sub>EG</sub> <sup>a</sup> (%) | Reusability cycle <sup>b</sup> | Y <sub>EG</sub> <sup>c</sup> (%) | Reaction Conditions       | References/ DOI                      |
|-------|-------------------------------------------------------|----------------|----------------------------------|--------------------------------|----------------------------------|---------------------------|--------------------------------------|
| 1     | Ni-W <sub>2</sub> C/AC                                | 100            | 61.0                             | 3                              | 51.0                             | 245 °C and 6 MPa for 0.5h | 14<br>10.1016/j.cattod.2009.03.012   |
| 2     | Ni/W/SiO <sub>2</sub> -Al <sub>2</sub> O <sub>3</sub> | 92             | 32.1                             | 2                              | 22.4                             | 245 °C and 6 MPa for 2h   | 53<br>10.1016/j.biortech.2012.03.059 |
| 3     | Ni-W/MSM <sup>d</sup>                                 | 100            | 72.9                             | 3                              | 45.6                             | 245 °C and 6 MPa for 2h   | 54<br>10.1039/c8ra00584b             |
| 4     | Ni/W/AC                                               | 83             | 47.6                             | 2                              | 42.2                             | 215 °C and 6.5 MPa for 3h | 42<br>10.1039/c4gc00664j             |
| 5     | NiWB(1:1)/CNTs                                        | 100            | 57.7                             | 3                              | 48.2                             | 250 °C and 6 MPa for 2h   | 55<br>10.1016/j.catcom.2016.01.014   |
| 6     | Ni <sub>0.3</sub> -W <sub>0.3</sub> /CNF              | 95             | 33.6                             | 3                              | 21.3                             | 245 °C and 6 MPa for 2h   | 56<br>10.1039/c6gc00703a             |
| 7     | Ni-W/SiO <sub>2</sub> -EEG                            | 100            | 63.3                             | 3                              | 55.1                             | 240 °C and 5 MPa for 2h   | 57<br>10.1016/j.fuel.2017.11.086     |
| 8     | Ni-W/SiO <sub>2</sub> @C-12                           | 100            | 60.7                             | 3                              | 46.6                             | 240 °C and 5 MPa for 1h   | 58<br>10.1007/s10562-018-2582-2      |
| 9     | Ni-W/SiO <sub>2</sub>                                 | 100            | 63.1                             | 3                              | 57.4                             | 240 °C and 5 MPa for 2h   | 59<br>10.1016/j.fuel.2018.04.115     |
| 10    | Ni-W/MO                                               | 100            | 47.6                             | 4                              | 44.0                             | 245 °C and 4 MPa for 2h   | 45<br>10.1021/acssuschemeng.0c00836  |
| 11    | Ni-W/M                                                | 100            | 68.7                             | 7                              | 66.9                             | 245 °C and 4 MPa for 2h   |                                      |
| 12    | Ni-W/T                                                | 100            | 34.5                             | 2                              | 26.1                             | 245 °C and 4 MPa for 2h   |                                      |
| 13    | Ni-W-Cu/MgAl <sub>2</sub> O <sub>4</sub> (1:3)        | 100            | 52.8                             | 3                              | 42.3                             | 245 °C and 3 MPa for 2h   | 37<br>10.1021/acsomega.1c00979       |
| 14    | Al-W-Ni/TUD-1                                         | 100            | 76.0                             | 2                              | 56.1                             | 230 °C and 4 MPa for 1.5h | 21<br>10.1039/C7GC02122D             |
| 15    | Al-W-Ni/NaZSM-5 <sup>d</sup>                          | 100            | 74.2                             | 4                              | 64.7                             | 220 °C and 4 MPa for 6h   | Present work                         |
| 16    | Al-W-Ni/NaZSM-5 <sup>d</sup>                          | 100            | 89.0                             | 3                              | 76.1                             | 220 °C and 4 MPa for 12h  | Present work                         |

**Table S5. Comparison of the reusability of different Ni-W catalysts in the conversion of cellulose to EG**

<sup>a</sup> Yield % of Ethylene glycol (Y<sub>EG</sub>) after first run

<sup>b</sup> Included only the number of cycles where the loss of EG yield of less than 30% (compared with the first run) in the recycling tests.

<sup>c</sup> Yield % of Ethylene glycol (Y<sub>EG</sub>) after mentioned number of cycles

<sup>d</sup> Catalyst was re-calcined and re-reduced before successive runs.
